# Supplementary material for: Loss-of-function variants in DNM1 cause a specific form of developmental and epileptic encephalopathy only in biallelic state
Source: PubMed Central journal article supplement — J Med Genet. 2021 Jun 25;59(6):549–53. doi: 10.1136/jmedgenet-2021-107769 (PMC9132866; doi:10.1136/jmedgenet-2021-107769), 2021-06-25
Supplement: jmedgenet-2021-107769supp001.pdf [file jmedgenet-2021-107769supp001.pdf]

Yigit G, et al.

**Loss-of-function variants in DNM1 cause a specific form of developmental and epileptic encephalopathy only in bi-allelic state****Supplemental Material****Supplementary Table 1.** *In silico* prediction and population allele frequencies of homozygous variants identified in individual III.1 (family 1).

| Genomic location (GRCh38) | Gene           | RefSeq         | HGVS cDNA   | HGVS protein   | Allele frequency in gnomAD <sup>a</sup> [no of homozygous] | Prediction Scores |                         |                 |      |
|---------------------------|----------------|----------------|-------------|----------------|------------------------------------------------------------|-------------------|-------------------------|-----------------|------|
|                           |                |                |             |                |                                                            | SIFT <sup>b</sup> | PolyPhen-2 <sup>c</sup> | MutationTaster  | CADD |
| Chr1:37540202             | <i>SNIP1</i>   | NM_024700.3    | c.881T>C    | p.(Ile294Thr)  | 0.00000399                                                 | T<br>(0.25)       | B<br>0.262              | disease causing | 22   |
| Chr1:37613865             | <i>RSPO1</i>   | NM_001242908.1 | c.464C>T    | p.(Pro155Leu)  | 0.000242                                                   | T<br>(0.18)       | B<br>0.003              | polymorphism    | 13   |
| Chr1:111320412            | <i>CHIA</i>    | NM_201653.3    | c.1377C>G   | p.(Asn459Lys)  | 0.000404 [1]                                               | T<br>(0.5)        | B<br>0.018              | polymorphism    | 7    |
| Chr1:113107745            | <i>LRIG2</i>   | NM_014813.2    | c.1465G>T   | p.(Asp489Tyr)  | 0                                                          | D<br>(0.019)      | B<br>0.264              | disease causing | 25   |
| Chr1:119623184            | <i>ZNF697</i>  | NM_001080470.1 | c.1159G>A   | p.(Gly387Ser)  | 0                                                          | D<br>(0.028)      | PD<br>0.997             | polymorphism    | 26   |
| Chr1:155032708            | <i>DCST2</i>   | NM_144622.2    | c.500G>A    | p.(Arg167His)  | 0.0000239                                                  | D<br>(0)          | B<br>0.113              | polymorphism    | 24   |
| Chr1:160553480            | <i>CD84</i>    | NM_001184881.1 | c.658C>T    | p.(Arg220Cys)  | 0.0000992                                                  | T<br>(0.07)       | PoD<br>0.714            | polymorphism    | 20   |
| Chr3:113656782            | <i>USF3</i>    | NM_001009899.3 | c.4900A>G   | p.(Arg1634Gly) | 0.000242                                                   | D<br>(0)          | PD<br>0.996             | disease causing | 26   |
| Chr3:120185340            | <i>GPR156</i>  | NM_153002.2    | c.655C>T    | p.(Arg219Trp)  | 0.00035                                                    | D<br>(0.01)       | PoD<br>0.636            | polymorphism    | 24   |
| Chr3:130571276            | <i>COL6A6</i>  | NM_001102608.1 | c.2860G>A   | p.(Val954Met)  | 0.00005                                                    | T<br>(0.09)       | PoD<br>0.594            | polymorphism    | 14   |
| Chr3:134482945            | <i>ANAPC13</i> | NM_015391.3    | c.-27-14T>G | -              | -                                                          | NA                | NA                      | polymorphism    | 16   |
| Chr3:142383406            | <i>XRN1</i>    | NM_019001      | c.2510G>A   | p.(Arg837Gln)  | 0.000143                                                   | T<br>(0.27)       | B<br>0.001              | polymorphism    | 22   |

|                |                |                |           |                |              |             |              |                 |    |
|----------------|----------------|----------------|-----------|----------------|--------------|-------------|--------------|-----------------|----|
| Chr3:151880910 | <i>SUCNR1</i>  | NM_033050.5    | c.367A>G  | p.(Ile123Val)  | 0.00000399   | D<br>(0.04) | B<br>0.003   | polymorphism    | 15 |
| Chr4:6575322   | <i>MAN2B2</i>  | NM_015274.2    | c.112G>A  | p.(Asp38Asn)   | 0.000269     | D<br>(0.01) | PD<br>1.000  | disease causing | 28 |
| Chr4:69639085  | <i>UGT2A2</i>  | NM_001105677.2 | c.556T>C  | p.(Ser186Pro)  | 0            | T<br>(0.15) | PoD<br>0.750 | polymorphism    | 23 |
| Chr4:69639085  | <i>UGT2A1</i>  | NM_001252274.2 | c.1159T>C | p.(Ser387Pro)  | 0            | T<br>(0.19) | B<br>0.358   | polymorphism    | 23 |
| Chr4:112618143 | <i>ZGRF1</i>   | NM_018392.4    | c.1899A>C | p.(Lys633Asn)  | 0.000048     | D<br>(0.01) | B<br>0.368   | polymorphism    | 18 |
| Chr4:128209866 | <i>LARP1B</i>  | NM_018078.3    | c.2558G>A | p.(Ser853Asn)  | 0            | T<br>(0.3)  | B<br>0.136   | disease-causing | 17 |
| Chr9:127928479 | <i>PIP5KL1</i> | NM_001135219.1 | c.233C>T  | p.(Pro78Leu)   | 0.0000319    | T<br>(0.46) | B<br>0.001   | polymorphism    | 7  |
| Chr9:128203567 | <i>DNM1</i>    | NM_004408.3    | c.97C>T   | p.(Gln33*)     | 0            | NA          | NA           | disease causing | 26 |
| Chr9:131504262 | <i>POMT1</i>   | NM_007171.3    | c.44T>C   | p.(Ile15Thr)   | 0            | D<br>(0)    | B<br>0.126   | disease causing | 23 |
| Chr15:43800640 | <i>HYPK</i>    | NM_016400.3    | c.42T>G   | p.(Asp14Glu)   | 0            | T<br>(0.11) | B<br>0.274   | disease causing | 18 |
| Chr15:45253505 | <i>SLC28A2</i> | NM_004212.3    | c.155C>G  | p.(Pro52Arg)   | 0.0000159    | T<br>(0.28) | B<br>0.035   | polymorphism    | 0  |
| Chr15:64153333 | <i>SNX22</i>   | NM_024798.2    | c.353A>G  | p.(Asn118Ser)  | 0.000114     | T<br>(1)    | B<br>0.000   | polymorphism    | 7  |
| Chr18:8785987  | <i>MTCL1</i>   | NM_015210.3    | c.1783G>A | p.(Glu595Lys)  | 0.0000823    | T<br>(0.17) | PoD<br>0.634 | disease causing | 23 |
| Chr19:1109420  | <i>SBNO2</i>   | NM_014963.2    | c.3220C>T | p.(Arg1074Cys) | 0.000440 [2] | D<br>(0)    | PD<br>0.912  | disease causing | 24 |

<sup>a</sup>Accessed in February 2021

<sup>b</sup>Score 1-0, *D* deleterious, *T* Tolerated

<sup>c</sup>HumVar prediction, Score 0-1, *B* benign, *PD* probably damaging, *PoD* possibly damaging

*NA* Not available

**Supplementary Table 2.** *In silico* prediction and population allele frequencies of homozygous variants identified in individual III.6 (family 2).

| Genomic location (GRCh 38) | Gene        | RefSeq      | HGVS cDNA | HGVS protein   | Allele frequency in gnomAD | Prediction Scores |                         |                 |      |
|----------------------------|-------------|-------------|-----------|----------------|----------------------------|-------------------|-------------------------|-----------------|------|
|                            |             |             |           |                |                            | SIFT <sup>b</sup> | PolyPhen-2 <sup>c</sup> | MutationTaster  | CADD |
| Chr9: 128222197            | <i>DNM1</i> | NM_004408.4 | c.850C>T  | p.(Gln284*)    | 0                          | NA                | NA                      | disease causing | 43   |
| Chr22:50448300             | <i>SBF1</i> | NM_002972.4 | c.5296C>T | p.(Arg1766Cys) | 0,00008454                 | T<br>(0.07)       | PoD<br>0.540            | disease causing | 25   |

<sup>a</sup>Accessed in February 2021

<sup>b</sup>Score 1-0, *D* deleterious, *T* Tolerated

<sup>c</sup>HumVar prediction, Score 0-1, *B* benign, *PD* probably damaging, *PoD* possibly damaging

NA Not available

**Supplementary Table 3.** Genotypes and associated clinical phenotypes in DNMI encephalopathy.

| Reference                           | EuroEPINOMICS-RES Consortium et al., 2014 [11] |                          |                                |                          |                         | Nakashima et al., 2016 [14] |                                    | Brereton et al., 2018 [16] |                           | This report            |                           |
|-------------------------------------|------------------------------------------------|--------------------------|--------------------------------|--------------------------|-------------------------|-----------------------------|------------------------------------|----------------------------|---------------------------|------------------------|---------------------------|
| DNM1 variant                        | c.529G>C;<br>p.Ala177Pro                       | c.618G>C;<br>p.Lys206Asn | c.1076G>C;<br>p.Gly359Ala      | c.709C>T;<br>p.Arg237Trp | c.194C>A;<br>p.Thr65Asn | c.127G>A;<br>p.Gly43Ser     | c.709C>T;<br>p.Arg237Trp           | c.1603A>G;<br>p.Lys535Glu  | c.1603A>G;<br>p.Lys535Glu | c.97C>T;<br>p.(Gln33*) | c.850C>T;<br>p.(Gln284*)  |
| Zygosity                            | het                                            | het                      | het                            | het                      | het                     | het                         | het                                | het                        | het                       | hom                    | hom                       |
| Number of patients                  | 1                                              | 1                        | 1                              | 1                        | 1                       | 1                           | 1                                  | 1                          | 1                         | 1                      | 1                         |
| Age at last follow-up               | 15 y                                           | 8 y                      | 6 y                            | 13 y                     | 6 y                     | 15 y                        | 6 y                                | 8 y, monozygotic twins     |                           | 5 y                    | 3 y 8 m                   |
| <b>Somatic growth</b>               |                                                |                          |                                |                          |                         |                             |                                    |                            |                           |                        |                           |
| Weight at birth                     | n. r.                                          | n. r.                    | n. r.                          | n. r.                    | n. r.                   | n. r.                       | n. r.                              | >97th centile              | 50-90th cent.             | +0.2 SD                | -0.9 SD                   |
| Length at birth                     | n. r.                                          | n. r.                    | n. r.                          | n. r.                    | n. r.                   | n. r.                       | n. r.                              | >97th centile              | >97th centile             | +0.1 SD                | -0.8 SD                   |
| HC at birth                         | n. r.                                          | n. r.                    | n. r.                          | n. r.                    | n. r.                   | n. r.                       | n. r.                              | 80th centile               | 65th centile              | +0.1 SD                | -0.7 SD                   |
| Weight at follow-up                 | n. r.                                          | n. r.                    | n. r.                          | n. r.                    | n. r.                   | n. r.                       | n. r.                              | 24th centile               | 30th centile              | -2.1 SD                | -3.7 SD                   |
| Length at follow-up                 | n. r.                                          | n. r.                    | n. r.                          | n. r.                    | n. r.                   | n. r.                       | n. r.                              | 28th centile               | 22th centile              | -2.4 SD                | -3.1 SD                   |
| HC at follow-up                     | n. r.                                          | n. r.                    | n. r.                          | microcephaly             | n. r.                   | n. r.                       | n. r.                              | 85th centile               | 95th centile              | -4.4 SD                | -4.5 SD                   |
| <b>Motor and speech development</b> |                                                |                          |                                |                          |                         |                             |                                    |                            |                           |                        |                           |
| Sitting                             | yes                                            | yes                      | yes                            | no                       | no                      | yes                         | yes                                | yes                        | yes                       | no                     | no                        |
| Walking                             | yes                                            | no                       | no                             | no                       | no                      | yes                         | yes                                | yes                        | yes                       | no                     | no                        |
| Functional hand use                 | n. r.                                          | n. r.                    | n. r.                          | n. r.                    | n. r.                   | n. r.                       | n. r.                              | yes                        | yes                       | no                     | no                        |
| Verbal expression                   | no                                             | no                       | no                             | no                       | no                      | no                          | no                                 | yes                        | yes                       | no                     | no                        |
| <b>Neurological features</b>        |                                                |                          |                                |                          |                         |                             |                                    |                            |                           |                        |                           |
| Epilepsy (onset; type)              | 7 m; VS                                        | 6 m; VS                  | 2 m; IS                        | 12 m; VS                 | 13 m; VS                | 11 m; LGS                   | 10 m; West syn.                    | no                         | no                        | 4 m; FS                | 6 m; FS                   |
| EEG                                 | MFED, GSW, slow bg                             | Hyps, MFED, GSW, slow bg | GSW                            | Hyps, GSW, slow bg       | Hyps, MFED, slow bg     | partial hyps, MFED          | MFED, GSW                          | normal                     | normal                    | Hyps, MFED             | Hyps, MFED                |
| Hypotonia                           | yes                                            | yes                      | yes                            | yes                      | yes                     | n. r.                       | yes                                | yes                        | yes                       | yes                    | yes                       |
| Spasticity                          | n. r.                                          | n. r.                    | n. r.                          | n. r.                    | n. r.                   | n. r.                       | n. r.                              | n. r.                      | n. r.                     | yes                    | no                        |
| Dystonia                            | n. r.                                          | n. r.                    | n. r.                          | n. r.                    | n. r.                   | n. r.                       | yes                                | n. r.                      | n. r.                     | yes                    | yes                       |
| Feeding problems                    | n. r.                                          | n. r.                    | n. r.                          | n. r.                    | n. r.                   | n. r.                       | n. r.                              | n. r.                      | n. r.                     | yes                    | yes                       |
| Visual impairment                   | n. r.                                          | n. r.                    | n. r.                          | yes                      | yes                     | n. r.                       | n. r.                              | n. r.                      | n. r.                     | yes                    | yes                       |
| Miscellaneous                       |                                                |                          | seizure free on ketogenic diet |                          |                         |                             |                                    | mild-moderate ID, autism   |                           | scoliosis              | mild bilat. optic atrophy |
| <b>Neuroimaging</b>                 | normal                                         | normal                   | normal                         | cerebral atrophy         | cerebral atrophy        | normal                      | arachnoid cyst right temporal lobe | n. p.                      | normal                    | ACC                    | cerebral atrophy          |

Supplementary Table 3. continued

| Reference                           | von Spiczak et al., 2017 [15] |                         |                         |                          |                          |                          |                          |                                        |                           |                                |                                        |                           |                           |                           |
|-------------------------------------|-------------------------------|-------------------------|-------------------------|--------------------------|--------------------------|--------------------------|--------------------------|----------------------------------------|---------------------------|--------------------------------|----------------------------------------|---------------------------|---------------------------|---------------------------|
| DNM1 variant                        | c.127G>A;<br>p.Gly43Ser       | c.134G>A;<br>p.Ser45Asn | c.194C>A;<br>p.Thr65Asn | c.416G>T;<br>p.Gly139Val | c.529G>C;<br>p.Ala177Pro | c.616A>G;<br>p.Lys206Glu | c.618G>C;<br>p.Lys206Asn | c.709C>T;<br>p.Arg237Trp               | c.731 G>A;<br>p.Ser238Ile | c.1037G>T;<br>p.Gly346Val      | c.1075G>A;<br>p.Gly359Arg              | c.1076G>C;<br>p.Gly359Ala | c.1117G>A;<br>p.Glu373Lys | c.1109G>A;<br>p.Gly397Asp |
| Zygosity                            | het                           | het                     | het                     | het                      | het                      | het                      | het                      | het                                    | het                       | het                            | het                                    | het                       | het                       | het                       |
| Number of patients                  | 1                             | 1                       | 1                       | 1                        | 1                        | 1                        | 1                        | 7                                      | 1                         | 1                              | 2                                      | 1                         | 1                         | 1                         |
| Age at last follow-up               | 8 y                           | 2 y                     | 8 y                     | 18 y                     | 15 y                     | 9 y                      | 8 y                      | 2 to 24 y                              | 19 y                      | 13 y                           | both 1 y                               | 7 y                       | 5 y                       | 2 y                       |
| <b>Somatic growth</b>               |                               |                         |                         |                          |                          |                          |                          |                                        |                           |                                |                                        |                           |                           |                           |
| Weight at birth                     | n. r.                         | n. r.                   | n. r.                   | n. r.                    | n. r.                    | n. r.                    | n. r.                    | n. r.                                  | n. r.                     | n. r.                          | n. r.                                  | n. r.                     | n. r.                     | n. r.                     |
| Length at birth                     | n. r.                         | n. r.                   | n. r.                   | n. r.                    | n. r.                    | n. r.                    | n. r.                    | n. r.                                  | n. r.                     | n. r.                          | n. r.                                  | n. r.                     | n. r.                     | n. r.                     |
| HC at birth                         | n. r.                         | n. r.                   | n. r.                   | n. r.                    | n. r.                    | n. r.                    | n. r.                    | n. r.                                  | n. r.                     | n. r.                          | n. r.                                  | n. r.                     | n. r.                     | n. r.                     |
| Weight at follow-up                 | n. r.                         | n. r.                   | n. r.                   | n. r.                    | n. r.                    | n. r.                    | n. r.                    | n. r.                                  | n. r.                     | n. r.                          | n. r.                                  | n. r.                     | n. r.                     | n. r.                     |
| Length at follow-up                 | n. r.                         | n. r.                   | n. r.                   | n. r.                    | n. r.                    | n. r.                    | n. r.                    | n. r.                                  | n. r.                     | n. r.                          | n. r.                                  | n. r.                     | n. r.                     | n. r.                     |
| HC at follow-up                     | microcephaly                  | n. r.                   | n. r.                   | n. r.                    | n. r.                    | n. r.                    | n. r.                    | n. r.                                  | n. r.                     | n. r.                          | microcephaly                           | microcephaly              | n. r.                     | microcephaly              |
| <b>Motor and speech development</b> |                               |                         |                         |                          |                          |                          |                          |                                        |                           |                                |                                        |                           |                           |                           |
| Sitting                             | no                            | no                      | no                      | no                       | no                       | no                       | no                       | no                                     | no                        | no                             | no                                     | no                        | no                        | no                        |
| Walking                             | no                            | no                      | no                      | no                       | no                       | no                       | no                       | no                                     | no                        | no                             | no                                     | no                        | no                        | no                        |
| Functional hand use                 | n. r.                         | n. r.                   | n. r.                   | n. r.                    | n. r.                    | n. r.                    | n. r.                    | n. r.                                  | n. r.                     | n. r.                          | n. r.                                  | n. r.                     | n. r.                     | n. r.                     |
| Verbal expression                   | no                            | no                      | no                      | no                       | no                       | no                       | no                       | no                                     | no                        | no                             | no                                     | no                        | no                        | no                        |
| <b>Neurological features</b>        |                               |                         |                         |                          |                          |                          |                          |                                        |                           |                                |                                        |                           |                           |                           |
| Epilepsy (onset; type)              | 3 w; AS, MS                   | no                      | 13 m; VS                | 4 m; VS                  | 7 m; VS                  | 2 m; VS                  | 6 m; VS                  | 3 to 12 m; VS                          | 8 m; GTCS                 | 6 m; VS                        | no / 1 m, VS                           | 2 m; IS                   | 4 y 6 m; VS               | 3 m; IS, MS               |
| EEG                                 | slow bg                       | normal                  | Hyps, MFED,<br>slow bg  | Hyps, MFED,<br>slow bg   | MFED, slow bg            | MFED                     | Hyps, MFED,<br>slow bg   | Hyps, MFED,<br>slow bg in most<br>pat. | n. r.                     | Hyps, MFED,<br>slow bg         | MFED, slow bg                          | SSW                       | GSW, slow bg              | Hyps, MFED,<br>slow bg    |
| Hypotonia                           | yes                           | yes                     | yes                     | yes                      | yes                      | yes                      | yes                      | yes                                    | yes                       | yes                            | yes                                    | yes                       | n. r.                     | yes                       |
| Spasticity                          | yes                           | n. r.                   | n. r.                   | yes                      | n. r.                    | n. r.                    | n. r.                    | yes                                    | n. r.                     | n. r.                          | n. r. / yes                            | n. r.                     | n. r.                     | n. r.                     |
| Dystonia                            | yes                           | n. r.                   | n. r.                   | yes                      | n. r.                    | yes                      | n. r.                    | yes                                    | n. r.                     | n. r.                          | n. r. / yes                            | n. r.                     | n. r.                     | n. r.                     |
| Feeding problems                    | n. r.                         | n. r.                   | n. r.                   | n. r.                    | n. r.                    | n. r.                    | n. r.                    | n. r.                                  | n. r.                     | n. r.                          | n. r.                                  | n. r.                     | n. r.                     | n. r.                     |
| Visual impairment                   | n. r.                         | n. r.                   | n. r.                   | n. r.                    | n. r.                    | n. r.                    | n. r.                    | n. r.                                  | n. r.                     | n. r.                          | n. r.                                  | n. r.                     | n. r.                     | n. r.                     |
| <b>Miscellaneous</b>                |                               |                         |                         |                          |                          |                          |                          |                                        |                           |                                | multifocal<br>subcortical<br>myoclonus |                           | FIRES at 4.5 y            |                           |
| <b>Neuroimaging</b>                 | normal                        | n. p.                   | cerebral atrophy        | normal                   | normal                   | n. p.                    | normal                   | normal /<br>cerebral atrophy           | normal                    | hypoplasia of<br>frontal lobes | thin CC / normal                       | cerebral atrophy          | normal                    | n. p.                     |

Abbreviations: ACC, agenesis of corpus callosum; AS, absence seizures; bg, background; CC, corpus callosum; FIRES, febrile infection-related epilepsy syndrome; FS, focal seizures; GSW, generalized spike-wave discharges; GTCS, generalized tonic-clonic seizures; ID, intellectual disability; HC, occipitofrontal head circumference; het., heterozygous; hom., homozygous; Hyps, hypsarrhythmia; IS, infantile spasms; LGS, Lennox-Gastaut syndrome; m, months; MFED, multifocal epileptiform discharges; MS, myoclonic seizures; n. p., not performed; n.r., not reported; SD, standard deviation; SSW, slow spike-wave discharges; VS, various seizure types; y, years; position referring to *DNM1* (ENST00000372923.8, NM\_004408.3).

## **Supplementary Methods**

### **Cytogenomic analysis**

Array-comparative genomic hybridization (array-CGH) of individual III.1 (family 1) and her parents was performed on genomic DNA using the Human Genome 180 K CGH Microarray (Agilent Technologies) according to the manufacturer's recommendations. The results were scanned using the SureScan Dx Microarray scanner G5761A (Agilent Technologies), and image and data analysis was carried out using the Feature Extraction Software and the Cytogenomics software (Agilent Technologies). Chromosomal microarray (CMA) of individual III.6 (family 2) was performed using the Affymetrix Cytoscan 750K chip (Thermo Fisher Scientific Inc.), and analyzed using the Affymetrix Chromosome Analysis Suite 3.1 (Thermo Fisher Scientific Inc.), reporting deletions over 100kb and duplications over 200kb in cytoregions and deletions over 100Kb and duplications over 500Kb in the remaining genomic regions
